# Supplementary material for: Role of N-cadherin in proliferation, migration, and invasion of germ cell tumours
Source: PubMed Central journal article supplement (PMC4741776; doi:10.18632/oncotarget.5288), 2015-10-02
Supplement: oncotarget-06-33426-s001.pdf [file oncotarget-06-33426-s001.pdf]

## SUPPLEMENTARY FIGURES

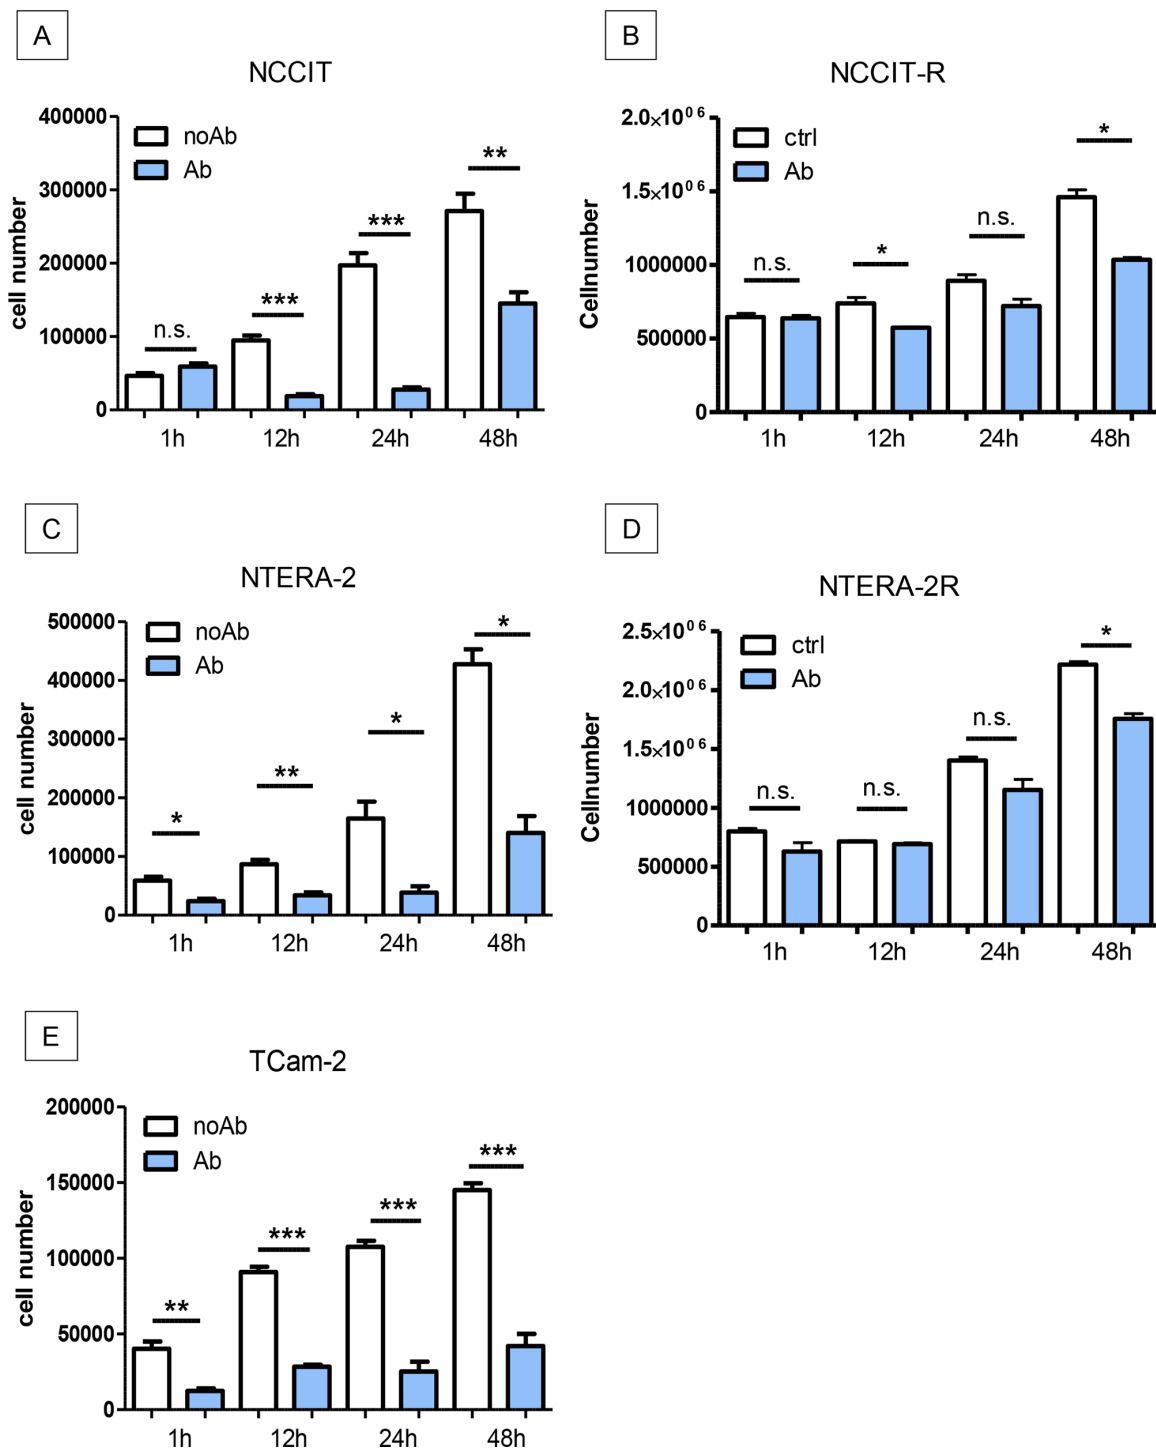

**Supplementary Figure S1: N-Cadherin blockade leads to significant decrease of proliferation.** In NCCIT cell line, the proliferation was significantly reduced after 12 h, 24 h and 48 h. After 1 h, no significant reduction of proliferation was distinguishable **A**. Proliferation of NCCIT-R was significantly reduced after 12 h, and 48 h. After 1 h and 24 h, no significant change in proliferation was distinguishable **B**. In NTERA-2, proliferation was significantly reduced after 1 h, 12 h, 24 h and 48 h **C**. In NTERA-2R, proliferation was significantly reduced after 1 h, 12 h, 24 h and 48 h **D**. Proliferation of TCam-2 was also significantly reduced after 1 h, 12 h, 24 h and 48 h **E**. (n.s. = not significant, \* =  $p < 0.05$ , \*\* =  $p < 0.005$ , \*\*\* =  $p < 0.0005$ ).

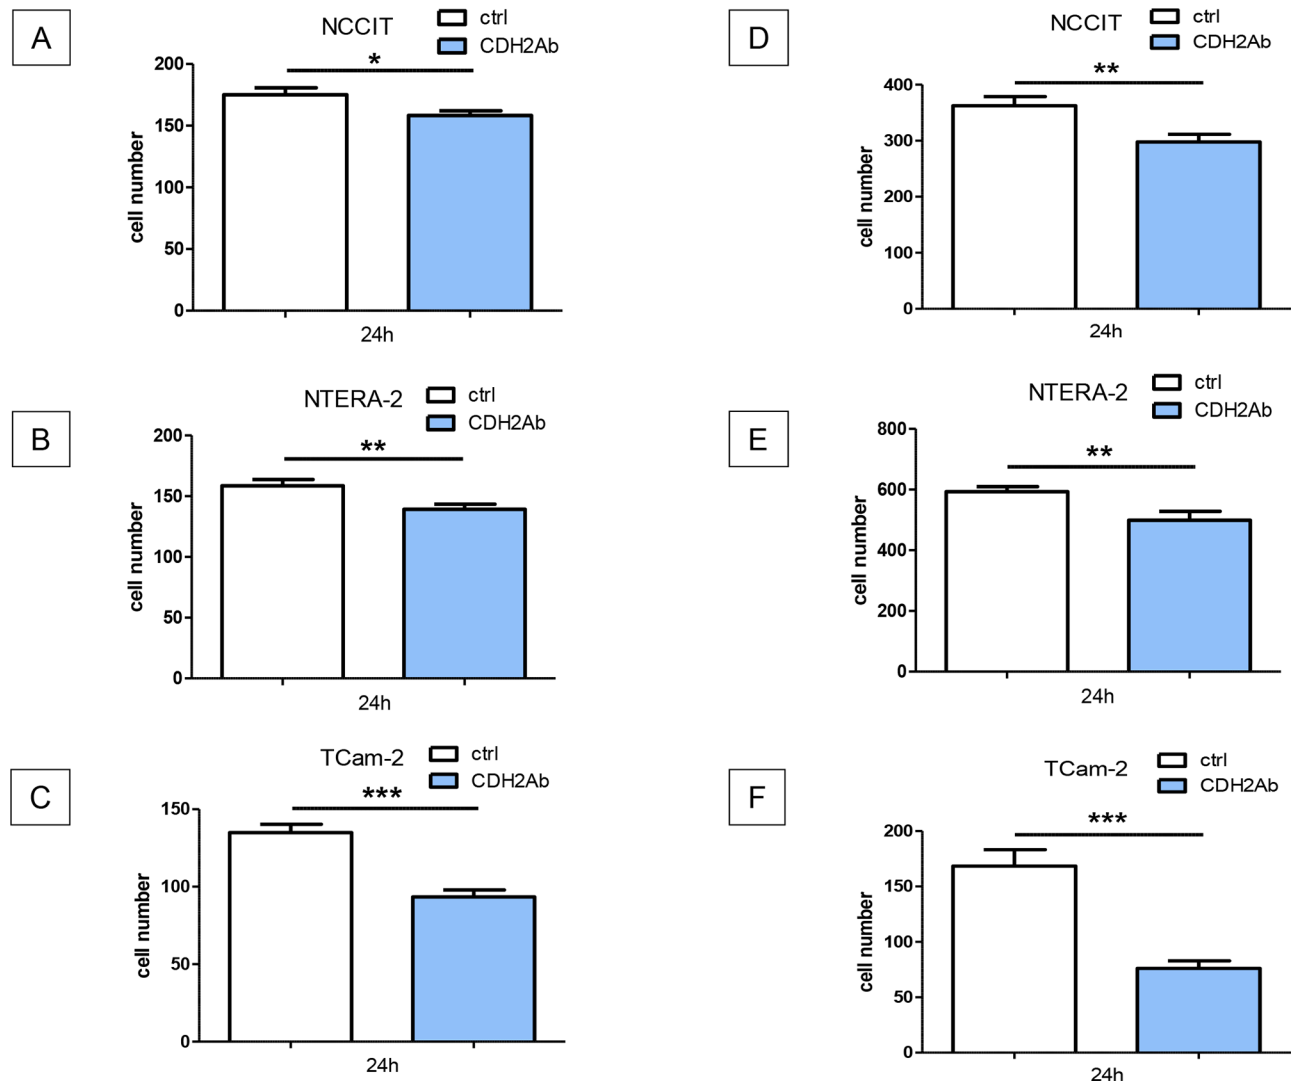

**Supplementary Figure S2: Blockade of N-cadherin leads to significant decrease of migration and invasion.** Migration of NCCIT **A**, NTERA-2 **B**, and TCam-2 **C**, cells was significantly reduced after blocking N-cadherin with a specific antibody for 24 hours. Invasiveness of NCCIT (**C**), NTERA-2 **D**, and TCam-2 **E**, cells could be significantly inhibited by the use of a specific antibody blocking N-cadherin for 24 hours. (n.s. = not significant, \* =  $p < 0.05$ , \*\* =  $p < 0.005$ , \*\*\* =  $p < 0.0005$ ).

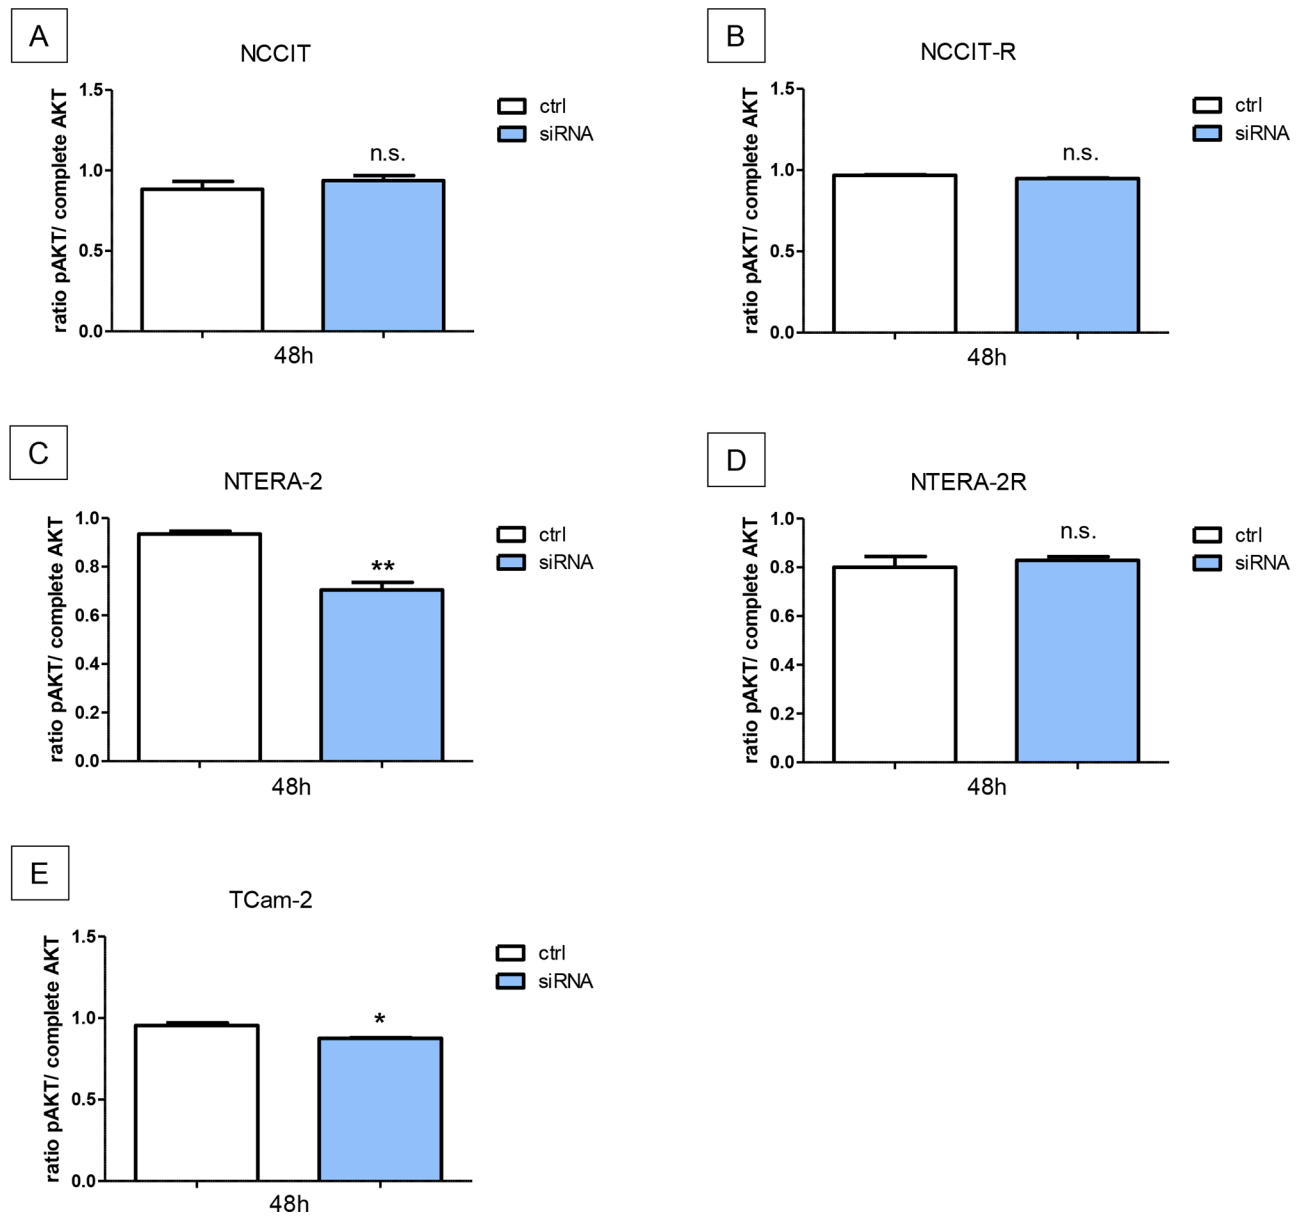

**Supplementary Figure S3: Downregulation of N-cadherin has no effect on pAKT in cisplatin-sensitive and resistant GCT cell lines.** Downregulation of N-cadherin had no effect on pAKT in NCCIT **A**, NCCIT-R **B**, NTERA-2R **D**, and TCam-2 **E**. In NTERA-2 levels of activated Pi3K were significantly increased in **C**. (n.s. = not significant,  $*=p < 0.05$ ,  $**=p < 0.005$ ,  $***=p < 0.0005$ ).

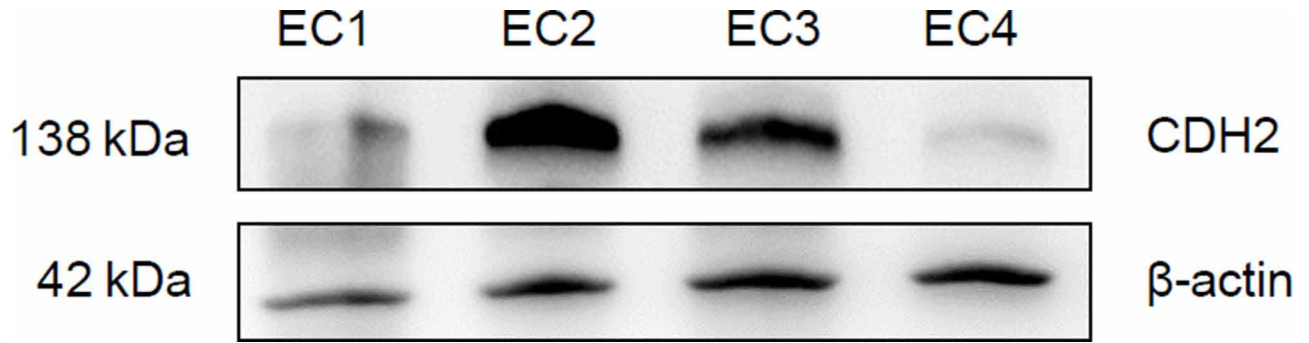

**Supplementary Figure S4: N-cadherin expression in unfixated embryonal carcinoma tissue.** Four embryonal carcinomas were analyzed for their N-Cadherin expression. While all tumors express N-cadherin in western blot analysis, the expression varies considerably between the different cases.
